# Supplementary material for: Photothermal effectiveness of microporous carbon nanospheres incorporated with polysulfone in direct contact membrane distillation
Source: Royal Society of Chemistry journal article supplement (doi:10.1039/d4ra05629a), 2024-01-01
Supplement: d4ra05629a1.pdf [file d4ra05629a1.pdf]

**Photothermal effectiveness of microporous carbon nanospheres incorporated  
with polysulfone in direct contact membrane distillation**

**Moataz Morad<sup>1</sup>, Mohamed S. Fahmi<sup>2</sup>, Abdu Subaihi<sup>3</sup>, Mohammed T. Alotaibi<sup>4</sup>, Ahmed Shahat<sup>2</sup>,  
Mohamed E. A. Ali<sup>5\*</sup>**

<sup>1</sup> Chemistry Department, Faculty of Sciences, Umm Al-Qura University, 21955 Makkah, Saudi Arabia.

<sup>2</sup> Chemistry Department, Faculty of Science, Suez University, P.O. Box: 43221, Suez, Egypt.

<sup>3</sup> Department of Chemistry, University College in Al-Qunfudhah, Umm Al-Qura University, Saudi Arabia.

<sup>4</sup> Department of Chemistry, Turabah University College, Taif University, P.O. Box 11099, Taif 21944, Saudi Arabia.

<sup>5</sup> Egypt Desalination Research Center of Excellence, Hydrogeochemistry Department, Desert Research Center, Cairo 11753, Egypt.

Corresponding author; [m7983ali@drc.gov.eg](mailto:m7983ali@drc.gov.eg)

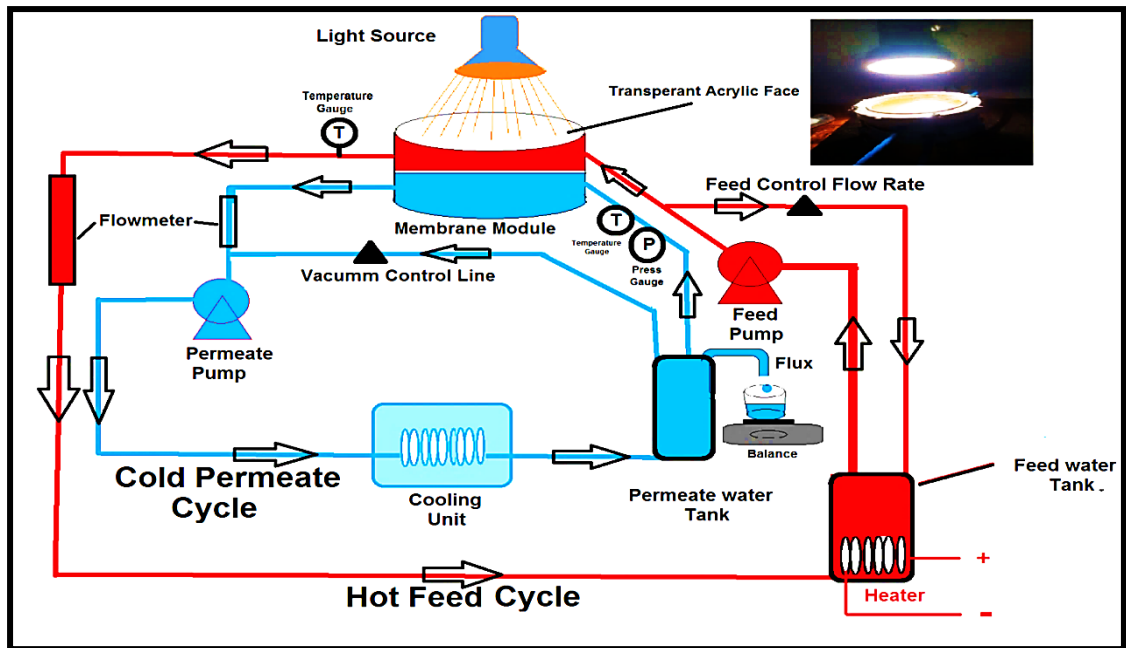

**Figure S1.** Schematic representation of the lab Scale Photothermal Direct Contact Membrane Distillation System

## 1. Synthesis of Carbon Nano-Spheres (CNS)

CNS particles were prepared by applying the green chemistry approach [1]. To summarize, 4.0 g of D-glucose (carbon precursor) was dissolved in 60 ml of deionized water (DI). Next, it was enclosed and heated in an electric furnace at 200 °C for 8 hours, followed by cooling to ambient temperature. Next, the resulting dark product was collected through filtration, washed with DI water and ethanol multiple times, and subsequently dried at 80 °C overnight. The produced CNS was subjected to calcination in an electric tube furnace at 700°C for 4 h under a nitrogen gas atmosphere.

### 1.2.

#### Characterization of CNS particles and membranes

Field emission scanning electron microscopy model (Zeiss FESEM Ultra 60) operated with 5 kV to investigate the surface morphology of the membranes and cross sections. Micromeritics ASAP-2020 was used to perform nitrogen adsorption - desorption isotherms at -196 °C, where the samples were degassed first for 4 h at 100 °C to remove any humidity or contaminants. To evaluate the values of surface area,

the Brunauer Emmett-Teller (BET) method was employed. In addition, the Pore size distribution of the produced CNS was calculated from the nitrogen isotherm adsorption branch via the Barrett-Joyner-Halenda (BJH) approach. The surface area and volume of micropore were analyzed by applying the t-plot method. Raman measurement was conducted at a 532 nm laser beam wavelength Raman microscope (Pro Raman-L Analyzer). The functional groups of CNS and membranes were investigated using Fourier transform infrared spectroscopy (FT-IR); the measurements were conducted using a BRUKER Vertex 70 FT-IR spectrometer. Infrared spectroscopy measurements have been completed over a wide range of frequencies, allowing measuring the evolution of both intra-molecular and inter-molecular vibrational modes. The membranes were scanned at a wavenumber of 400–4000 cm<sup>-1</sup>, in order to investigate changes in the functional groups of the pristine and composite membranes and High-resolution transmission electron microscope (HRTEM) images were taken by JEOL JEM-2100 Electron Microscope. Absorption wavelengths range for CNS as a photothermal agent was determined by the compact UV-spectrophotometer model UV-2600i in wavelength was ranged from 240 to 900 nm at different suspension concentration of CNS 0.03%, 0.015% and 0.0075%. The light-to-heat conversion, and the effects of structural features in the development of broadband light-absorbing nanomaterials[2, 3] is the essential requirement and prerequisite which can be defined as:

$$A = \frac{\int_{\lambda_1}^{\lambda_2} (1 - R - T) S_{solar} d\lambda}{\int_{\lambda_1}^{\lambda_2} S_{solar} d\lambda} \dots\dots\dots (1)$$

where A, R, and T are the standards for absorbance, reflectance, and transmittance, respectively, S solar is the wavelength-dependent, λ<sub>1</sub> and λ<sub>2</sub> are the integration beginning and end wavelengths, respectively [4-6]. Water contact angle of CNS was measured at room temperature using sessile drop technique on the drop shape analyzer where CNS pressed sheet were wetted with 3 μL of distilled water via thin needle to form a tiny droplet onto the sample surface add to that different prepared membranes were measured with same steps . Evaporation rate was evaluated and calculated from equation(2) for DI water compared to CNS suspension water by using light source 100

wat (about 1 sun ) at distance 12 cm from Pateri dish with surface area(0.00385 m<sup>2</sup>) contains of 50 ml from investigated liquid.

$$E.R = \Delta W / ( A \times \Delta t ) \dots\dots\dots (2)$$

Where ( $\Delta W$ ) signed to weight change per kg, (A) refers to surface area per m<sup>2</sup> and ( $\Delta t$ ) evaporating rate time per hour.

The dynamic mechanical analysis was performed using a Dynamic Mechanical Analyzer (DMA) (Model DMA Q800 V21.1 Build 51 - Controlled Force) where the samples, cut into strips measuring 40 mm in length and 10 mm in width, were subjected to mechanical testing. The measurement of cross-sectional thickness of the membranes, a precise thickness gauge was employed. The mechanical properties were quantified as follows [7]:

$$Tensile\ Strength\ (T.S) = \frac{F}{A_o} \quad (MPa) \dots\dots\dots (3)$$

Where F is the force applied (N) and A<sub>o</sub> is the original cross-sectional area of the membrane sample (mm<sup>2</sup>).

$$Elongation\ rate = \frac{\Delta L}{L_o} \quad (\%) \dots\dots\dots (4)$$

Where  $\Delta L$  is the change in length (mm) and L<sub>0</sub> is the original length of the membrane sample (mm).

$$Young\ s\ Modulus\ (E) = \frac{tensile\ strength}{tensile\ strain} \quad (MPa) \dots\dots\dots(5)$$

Liquid Entry Pressure (LEP), it was measured for all the membranes by using a dead end cell (HP4750 Stirred Cell) system, which was connected to a nitrogen gas cylinder as inert gas to apply the required pressures using distilled water as a liquid [8, 9]

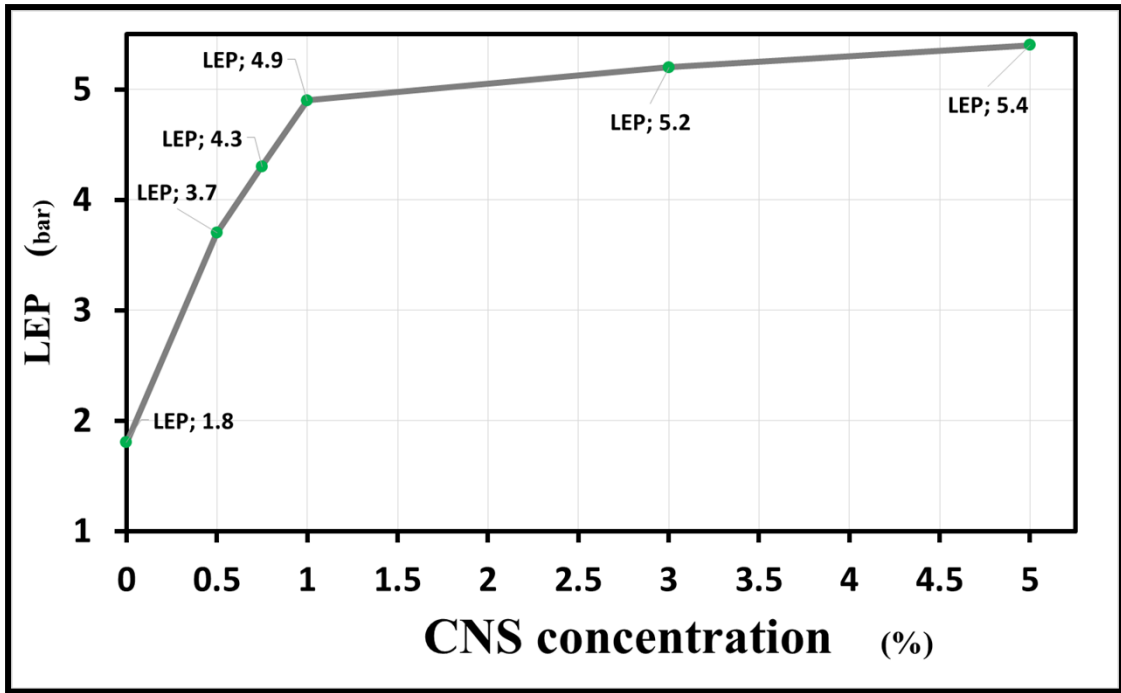

**Figure S2.** LEPs of different PSF/CNS composite membranes at room temperature by dead end Nano filtration cell, N<sub>2</sub> cylinder as pressure source and DI water as a liqu

**Evaluation of Porosity of prepared membranes compared to flux values**

The total Porosity (ε) (%) of different prepared membranes was determined after immersion in DI water for 24 hours at room temperature and weighted after swiping excess of water by filter paper (W<sub>w</sub>) (g) and then dry in 50 °C for 4 hours and take dry weight (W<sub>d</sub>) (g) and calculated by equation (3):

$$\epsilon = \frac{\frac{W_w - W_d}{\rho_1}}{\frac{W_w - W_d}{\rho_1} + \frac{W_d}{\rho_2}} \times 100 \quad (\%) \dots\dots\dots (6)$$

Where ρ<sub>1</sub> is DI water density (0.998 g/cm<sup>3</sup>) and ρ<sub>2</sub> is density of polysulfone (1.24 g/cm<sup>3</sup>) [10].

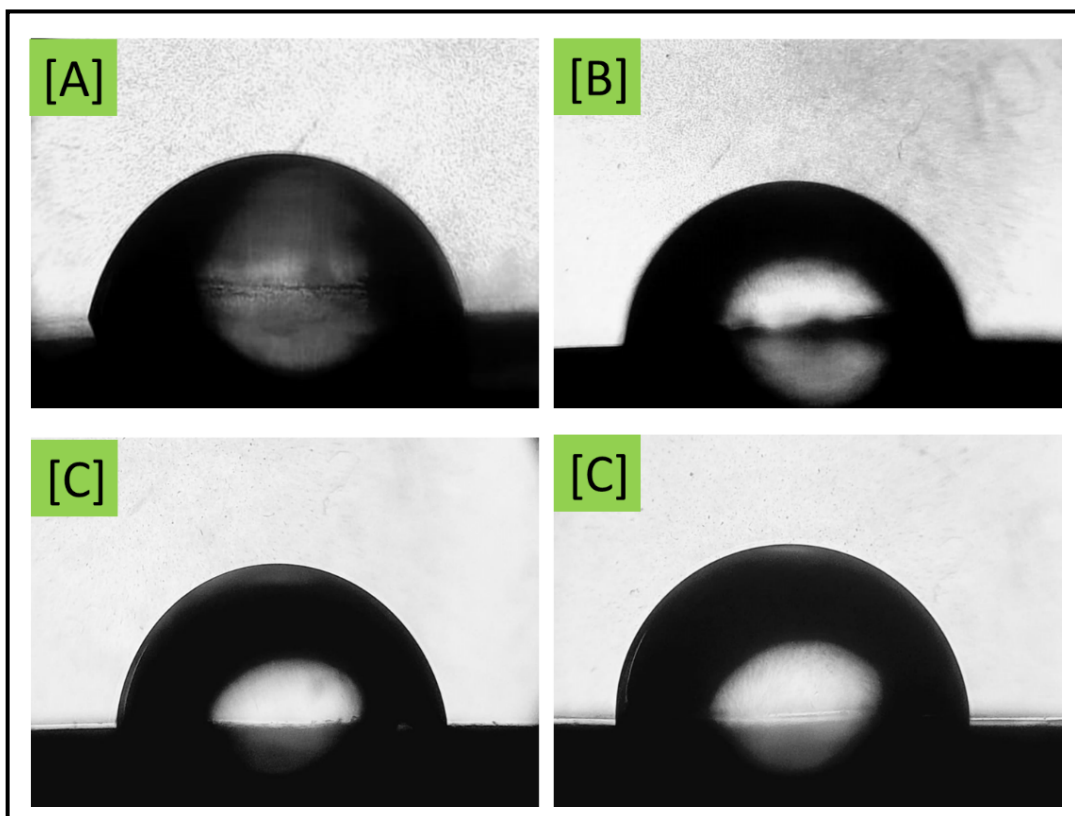

**Fig. S3:** Illustrates images of different PSF membranes contact angles measurements according to CNS percent A) Neat PSF B) CNS (0.5%) C) CNS (3%) D) CNS (5%)

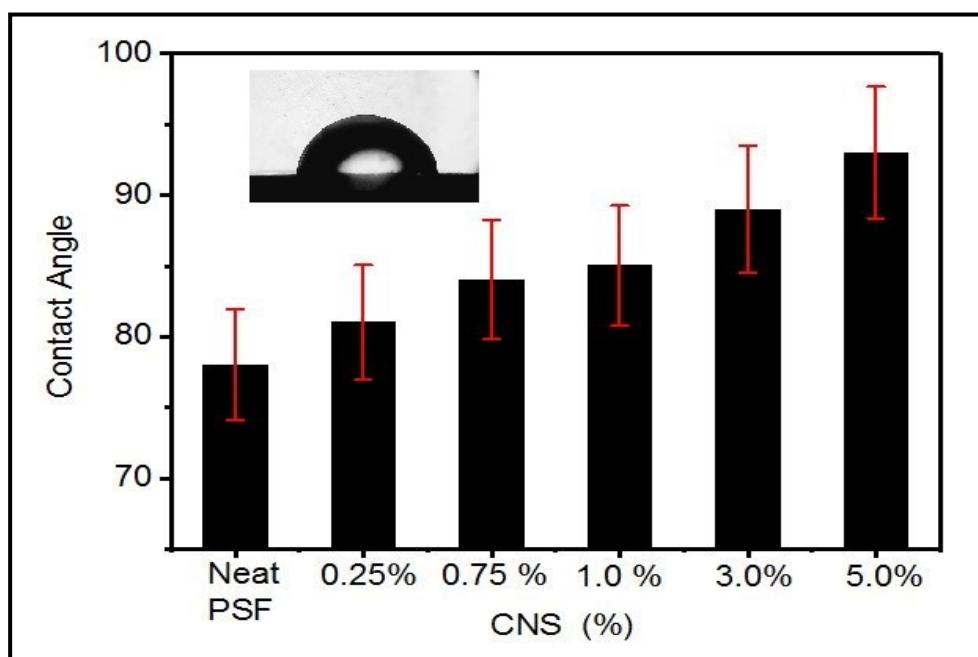

**Fig. S4:** Illustrates contact angle measurements of pristine and composite PSF/CNS membranes at room temperature.

**Table S1.** A comparing of photothermal composite PSF/CNTs membranes with some composite polysulfone previous works.

| <b>Composite Membrane</b>                                                             | <b>Object</b>                                         | <b>MD configuration</b> | <b>Flux Value L/m<sup>2</sup>.h</b>      | <b>Salts rejection</b> | <b>Operation conditions</b>                                     | <b>Ref.</b> |
|---------------------------------------------------------------------------------------|-------------------------------------------------------|-------------------------|------------------------------------------|------------------------|-----------------------------------------------------------------|-------------|
| PSF/CuO                                                                               | Enhancement of photothermal properties                | PMD                     | 9.87                                     | 99.6 %                 | T <sub>F</sub> =60 °C T <sub>P</sub> =20 °C<br>FC=123,14 mg/L   | [11]        |
| PSF/PTFE NPs                                                                          | The transition from hydrophobic to superhydrophobic   | DCMD                    | 39.5                                     | 99.99 %                | T <sub>F</sub> =60 °C T <sub>P</sub> =20 °C<br>FC=30 g/L NaCl   | [12]        |
| GO-PSF                                                                                | Enhancement morphology                                | DCMD                    | 20.8                                     | 99.85 %                | T <sub>F</sub> =90 °C T <sub>P</sub> =20 °C<br>FC=20.8 g/L NaCl | [13]        |
| PS/PEG/Al <sub>2</sub> O <sub>3</sub><br>PS-PEG/CuO<br>PS-PEG/SWCNTs<br>PS/PEG/MWCNTs | Enhancement Morphology                                | EDCMD                   | (19.92)<br>(18.92)<br>(20.91)<br>(18.20) | 99.99 %                | T <sub>F</sub> =60 °C T <sub>P</sub> =20 °C<br>FC=20 g/L NaCl   | [14]        |
| PSF/CNS                                                                               | Enhancement Of photothermal properties and morphology | PDCMD                   | 7.756                                    | 99.99%                 | T <sub>F</sub> =50 °C T <sub>P</sub> =20±3 °C<br>FC= 2.0 g/L    | Our work    |
| PSF/MWCNTs<br>PSF/SiO <sub>2</sub><br>PSF/ZnO<br>PSF/TiO <sub>2</sub>                 | Enhancement morphology                                | VEDCMD                  | 41.58<br>34.42<br>38.84<br>35.6          | 99.99 %                | T <sub>F</sub> =60 °C T <sub>P</sub> =20 °C<br>FC=10 g/L NaCl   | [15]        |

## **Abbreviation**

- PMD : Photothermal Membrane Distillation
- DCMD : Direct Contact Membrane Distillation
- EDCMD : Direct Contact Membrane Distillation
- PDCMD : Photothermal Direct Contact Membrane Distillation
- VEDCMD: Vacuum Enhanced Direct Contact Membrane Distillation
- T<sub>f</sub> : Feed temperature
- T<sub>p</sub> : Permeate temperature
- FC : Feed concentration

## **Referances**

- [1] S.K. Mohamed, M. Abuelhamd, N.K. Allam, A. Shahat, M. Ramadan, H.M. Hassan, Eco-friendly facile synthesis of glucose-derived microporous carbon spheres electrodes with enhanced performance for water capacitive deionization, *Desalination*, 477 (2020) 114278.
- [2] M. Xiong, X. Shan, C. Liu, L. Yang, M. Meng, Y. Di, Z. Gan, Broadband photodetectors based on enhanced photothermal effect of polymer encapsulated graphene film, *Applied Surface Science Advances*, 3 (2021) 100050.
- [3] P. Cheng, D. Wang, P. Schaaf, A review on photothermal conversion of solar energy with nanomaterials and nanostructures: From fundamentals to applications, *Advanced Sustainable Systems*, 6 (2022) 2200115.
- [4] M. Gao, L. Zhu, C.K. Peh, G.W. Ho, Solar absorber material and system designs for photothermal water vaporization towards clean water and energy production, *Energy & Environmental Science*, 12 (2019) 841-864.
- [5] L. Zhu, M. Gao, C.K.N. Peh, G.W. Ho, Solar-driven photothermal nanostructured materials designs and prerequisites for evaporation and catalysis applications, *Materials Horizons*, 5 (2018) 323-343.
- [6] R. Xu, H. Zhao, H. Jin, Z. Wang, Z. Zhang, S. Xu, Z. Zeng, S. Wang, Y. Lei, Scalable fabrication of geometry-tunable self-aligned superlattice photonic crystals for spectrum-programmable light trapping, *Nano Energy*, 58 (2019) 543-551.
- [7] Rugbani, A. (2009). Investigating the influence of fabrication parameters on the diameter and mechanical properties of polysulfone ultrafiltration hollow-fibre membranes (Doctoral dissertation, Stellenbosch: University of Stellenbosch).
- [8] G. Rácz, S. Kerker, Z. Kovács, G. Vatai, M. Ebrahimi, P. Czermak, Theoretical and experimental approaches of liquid entry pressure determination in membrane distillation processes, *Periodica Polytechnica: Chemical Engineering*, 58 (2014) 81-91.
- [9] M. Khayet, C. Feng, K. Khulbe, T. Matsuura, Preparation and characterization of polyvinylidene fluoride hollow fiber membranes for ultrafiltration, *Polymer*, 43 (2002) 3879-3890.
- [10] Velu, S., Muruganandam, L., & Arthanareeswaran, G. (2015). Preparation and performance studies on polyethersulfone ultrafiltration membranes modified with gelatin for treatment of tannery and distillery wastewater. *Brazilian Journal of Chemical Engineering*, 32, 179-189.



- [11] Kamiński, W., B. Opara, and M. Tylman. "Membrane distillation using solar energy–membrane modification." *Innovations* 7, no. 3 (2019): 115-117.
- [12] M.S. Fahmey, A.-H.M. El-Aassar, M.M. Abo-Elfadel, A.S. Orabi, R. Das, Comparative performance evaluations of nanomaterials mixed polysulfone: A scale-up approach through vacuum enhanced direct contact membrane distillation for water desalination, *Desalination*, 451 (2019) 111-116.
- [13] Camacho, Lucy M., Trent A. Pinion, and Samuel O. Olatunji. "Behavior of mixed-matrix graphene oxide–polysulfone membranes in the process of direct contact membrane distillation." *Separation and Purification Technology* 240 (2020): 116645.
- [14] Shahlol, Osamah MA, Heba Isawi, Mohamed G. El-Malky, and Abd El-Hameed M. Al-Aassar. "Performance evaluation of the different nano-enhanced polysulfone membranes via membrane distillation for produced water desalination in Sert Basin-Libya." *Arabian Journal of Chemistry* 13, no. 4 (2020): 5118-5136.
- [15] Khayet, Mohamed, and Rong Wang. "Mixed matrix polytetrafluoroethylene/polysulfone electrospun nanofibrous membranes for water desalination by membrane distillation." *ACS applied materials & interfaces* 10, no. 28 (2018): 24275-24287.
